# Supplementary material
Source: ML conference proceedings conference paper supplement (https://proceedings.neurips.cc/paper_files/paper/2018/hash/aee92f16efd522b9326c25cc3237ac15-Abstract.html)
Supplement: Supplementary file [file aee92f16efd522b9326c25cc3237ac15-Supplemental.zip]

## A Deduce ELBO

The objective of our model can be deduced in the perspective of variational inference. Concretely, we can introduce a variational distribution  $Q(s)$  to approximate the posterior of noise transition matrix  $s$ , and apply the Jensen's Inequality to the log-likelihood of data as follows,

$$\begin{aligned}
\ln P(\tilde{y}|x) &= \ln \int_s \sum_y P(\tilde{y}|y, s) P(y|x) P(s) ds \\
&= \ln \int_s \sum_y P(\tilde{y}|y, s) P(y|x) \frac{Q(s) P(s)}{Q(s)} ds \\
&\geq \mathbb{E}_{Q(s)} \left[ \ln \sum_y P(\tilde{y}|y, s) P(y|x) - \ln \frac{Q(s)}{P(s)} \right] \\
&= \mathbb{E}_{Q(s)} \left[ \ln \sum_y P(\tilde{y}|y, s) P(y|x) - \ln \frac{Q(s_o) \frac{ds_o}{ds}}{P(s_o) \frac{ds_o}{ds}} \Big|_{s_o=f(s)} \right] \\
&= \mathbb{E}_{Q(s)} \left[ \ln \sum_y P(\tilde{y}|y, s) P(y|x) - \ln (Q(s_o)/P(s_o)) \Big|_{s_o=f(s)} \right],
\end{aligned} \tag{3}$$

where  $f(\cdot)$  is the mapping function to transform the noise transition matrix  $s$  into its structure  $s_o$ .

## B Network structures and training settings

As we have explained in the paper, our GAN-like structure consists of three modules, generator, discriminator and reconstructor. We respectively illustrate their network configuration as follows.

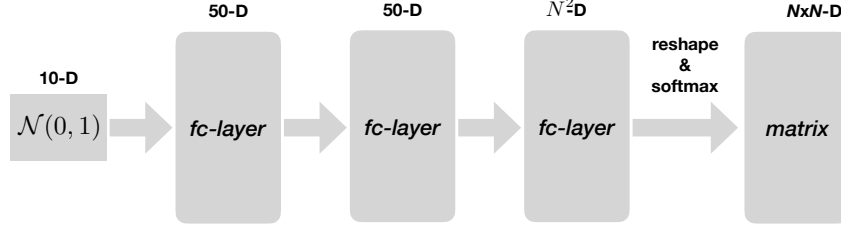

Figure 5: The network configuration of the generator module.

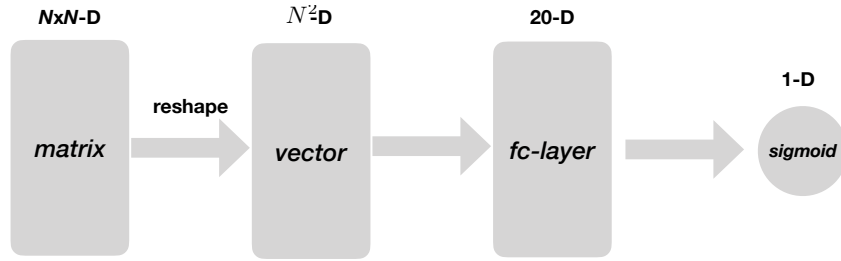

Figure 6: The network configuration of the discriminator module.

The learning rate is initialized as 0.1, and decreases with the operation `tf.train.exponential_decay` with the staircase in tensorflow. The corresponding decay factor is set 0.1. The learning rate for generator and discriminator is fixed with  $3e - 4$ .

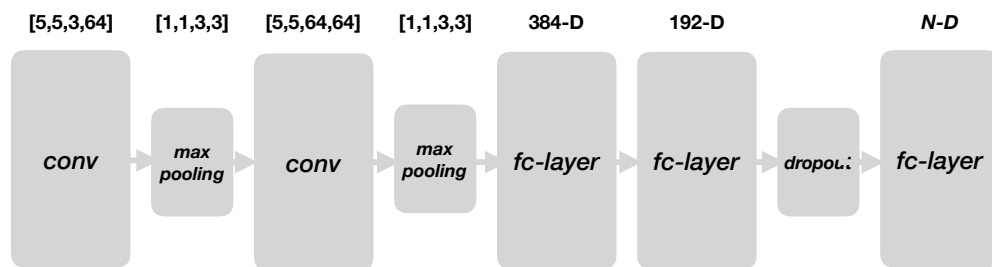

Figure 7: The network configuration of the reconstructor module.
